# Supplementary material
Source: PubMed Central journal article supplement (PMC3477802)
Supplement: NIHMS404985-supplement-01.pdf [file NIHMS404985-supplement-01.pdf]

## Supplemental Material

### Magnetic Resonance Imaging and Volumetric Analysis: Novel Tools to Study the Effects of Thyroid Hormone Disruption on White Matter Development

Michael H. Powell<sup>a</sup>, Hao Van Nguyen<sup>a</sup>, Mary Gilbert<sup>b</sup>, Mansi Parekh<sup>c</sup>, Luis M. Colon Perez<sup>d</sup>,  
Thomas H. Mareci<sup>e</sup>, and Eric Montie<sup>a\*</sup>

<sup>a</sup>Dep. of Natural Sciences, University of South Carolina Beaufort, Bluffton, SC 29909, USA

<sup>b</sup>Toxicity Assessment Division, US EPA, Research Triangle Park, NC, USA

Deps. of <sup>c</sup>Neuroscience, <sup>d</sup>Physics, and <sup>e</sup>Biochemistry and Molecular Biology,

University of Florida, Gainesville, FL, USA

#### **Name and address of corresponding author:**

Eric W. Montie, Department of Natural Sciences, University of South Carolina Beaufort, One  
University Boulevard, Bluffton, SC 29909; tel +1 843-208-8107; fax +1 843-208-8294; email  
emontie@uscb.edu

## Table of Contents

|                                                                                       |   |
|---------------------------------------------------------------------------------------|---|
| <b>Supplemental Material, Table 1:</b> Inter-rater Variability among Segmenters       | 3 |
| <b>Supplemental Material, Table 2:</b> Brain Volumes From <i>In Vivo</i> Images       | 4 |
| <b>Supplemental Material, Figure 1:</b> Thyroid Hormones from All Rats Exposed to PTU | 5 |

Supplemental Material, Table 1  
Inter-rater Variability Between Segmenters

| Analyst | Cerebral WM<br>Volume (mm <sup>3</sup> ) | Cerebral GM<br>Volume (mm <sup>3</sup> ) | Total Cerebral<br>Volume (mm <sup>3</sup> ) | Hippocampus<br>Volume (mm <sup>3</sup> ) | % Cerebral<br>WM | % Hippocampus |
|---------|------------------------------------------|------------------------------------------|---------------------------------------------|------------------------------------------|------------------|---------------|
| 1       | 179.50                                   | 975.11                                   | 1154.62                                     | 89.44                                    | 15.55            | 7.75          |
| 2       | 175.65                                   | 974.73                                   | 1150.39                                     | 90.48                                    | 15.27            | 7.86          |
| 3       | 181.58                                   | 969.52                                   | 1151.10                                     | 87.88                                    | 15.77            | 7.63          |
| 4       | 184.16                                   | 961.96                                   | 1146.11                                     | 89.63                                    | 16.07            | 7.82          |
| 5       | 188.51                                   | 955.49                                   | 1144.00                                     | 87.97                                    | 16.48            | 7.69          |
| 6       | 175.56                                   | 966.96                                   | 1142.52                                     | 88.73                                    | 15.37            | 7.77          |
| Mean    | 180.83                                   | 967.29                                   | 1148.12                                     | 89.02                                    | 15.75            | 7.75          |
| St.Dev  | 5.04                                     | 7.61                                     | 4.66                                        | 1.02                                     | 0.46             | 0.08          |

WM = White matter

GM = Gray matter

Supplemental Materials, Table 2. Brain Volumes from *In Vivo* Images Compared to *Ex vivo* Images of the Same Rats Exposed to 10 ppm Propylthiouracil (PTU)

| Animal ID | Treatment | Body Weight | T3 (ng/dL) | T4 (ng/mL) | Scan type | WM volume | GM Volume | Total Segmented Volume | Hippocampus volume | Percent WM | Percent Hippocampus |
|-----------|-----------|-------------|------------|------------|-----------|-----------|-----------|------------------------|--------------------|------------|---------------------|
| 01        | 0 ppm     | 373.1       | 51.2       | 33.9       | In vivo   | 122.77    | 1017.99   | 1140.76                | 77.58              | 10.76      | 6.80                |
| 04        | 0 ppm     | 402.2       | 39.7       | 26.2       | In vivo   | 146.45    | 1057.88   | 1204.34                | 67.51              | 12.16      | 5.61                |
| 22        | 10 ppm    | 334.1       | 40.8       | 16.1       | In vivo   | 94.38     | 1087.54   | 1181.91                | 62.55              | 7.99       | 5.29                |
| 24        | 10 ppm    | 286.5       | 42.5       | 26.9       | In vivo   | 118.60    | 1026.82   | 1145.42                | 65.77              | 10.35      | 5.74                |
| 01        | 0 ppm     | 373.1       | 51.2       | 33.9       | Ex vivo   | 167.41    | 949.34    | 1116.75                | 82.74              | 14.99      | 7.41                |
| 04        | 0 ppm     | 402.2       | 39.7       | 26.2       | Ex vivo   | 195.05    | 982.68    | 1177.73                | 94.36              | 16.56      | 8.01                |
| 22        | 10 ppm    | 334.1       | 40.8       | 16.1       | Ex vivo   | 140.37    | 939.09    | 1079.46                | 87.02              | 13.00      | 8.06                |
| 24        | 10 ppm    | 286.5       | 42.5       | 26.9       | Ex vivo   | 140.61    | 885.18    | 1025.79                | 76.84              | 13.71      | 7.49                |

WM = White Matter

GM = Gray Matter

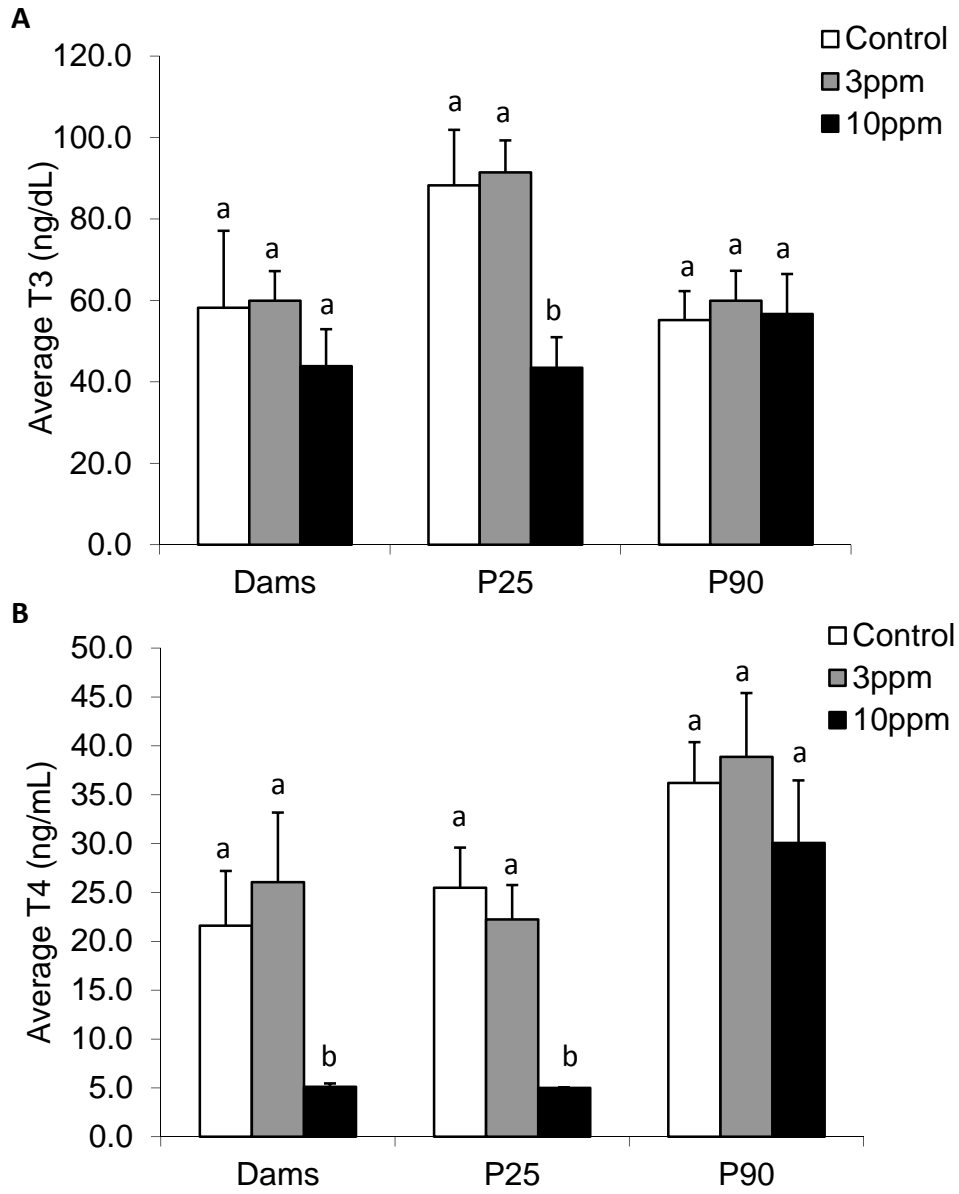

Supplemental Material, Figure 1. Average T3 and T4 values of all rats exposed to propylthiouracil PTU. (A) Average T3 values of all age groups. Note the reduction in T3 levels at postnatal day 25 (P25) but recovery at P90. (B) Average T4 values of all age groups, note the reduction in T4 levels at P25 but recovery at P90. Seven of the eight dams and fifteen of fifteen P25 pups exposed to 10ppm PTU had T4 values below the minimum detection level. Values that share the same letter are not significantly different from each other ( $P > 0.05$ ); error bars show standard deviation.
